# Supplementary material for: Transcriptome-wide co-expression analysis identifies LRRC2 as a novel mediator of mitochondrial and cardiac function
Source: PubMed Central journal article supplement (PMC5291451; doi:10.1371/journal.pone.0170458), 2017-02-03
Supplement: pone.0170458.s003.pdf [file pone.0170458.s003.pdf]

### Supplementary Figure 3

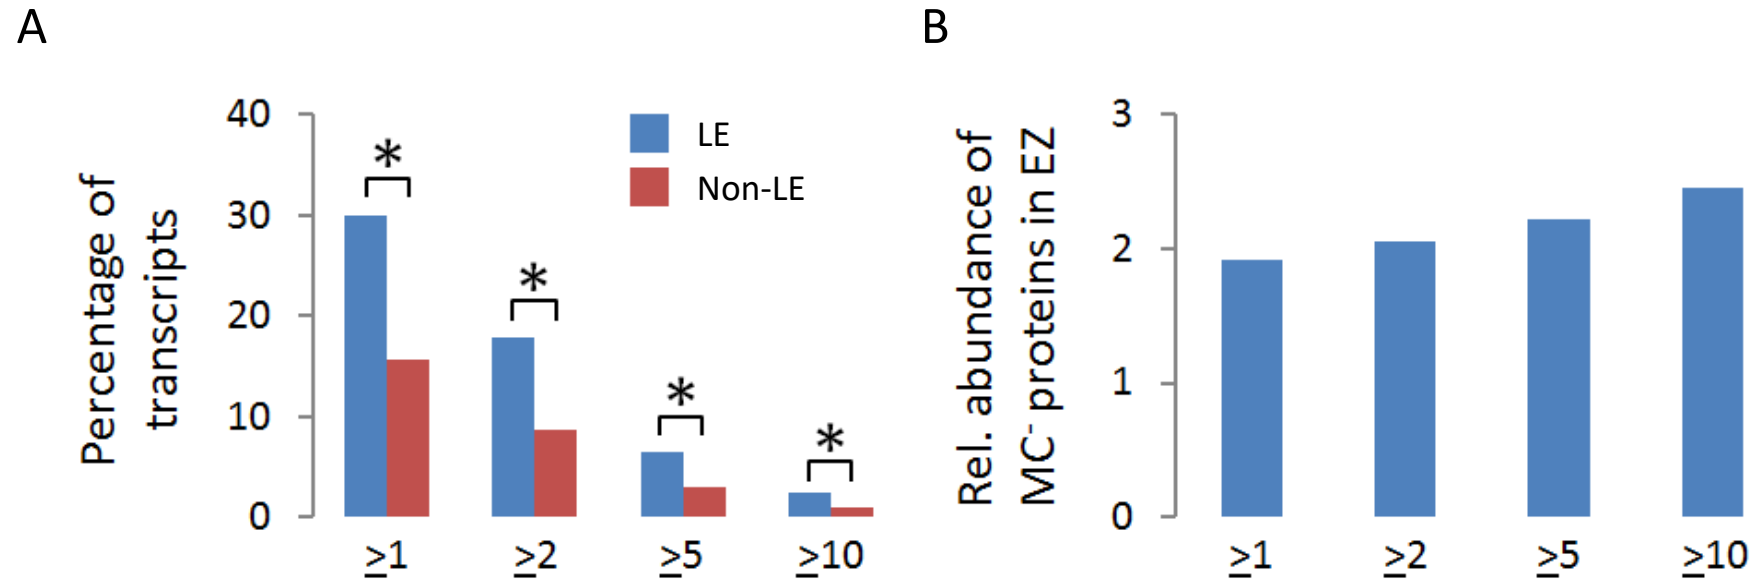

**Supplementary Figure 3. Prioritized transcript population is enriched for protein products that physically interact with known mitochondrial proteins.** A, Percentage of transcripts within and outside the LE that generate proteins reported (in the BIOGRID database) to interact with  $\geq 1$ ,  $\geq 2$ ,  $\geq 5$ , and  $\geq 10$  known mitochondrial proteins. B, Relative abundance of MC<sup>-</sup> proteins (proteins that are not annotated by MitoCarta as being mitochondrially-localized but which are reported (in the BIOGRID database) to interact with known mitochondrial proteins) that interact with  $\geq 1$ ,  $\geq 2$ ,  $\geq 5$ , and  $\geq 10$  known mitochondrial proteins in the LE compared to outside the LE.
